# Supplementary material for: Enzyme-Treated Caviar Prevents UVB Irradiation-Induced Skin Photoaging
Source: MDPI journal article supplement (doi:10.3390/md20110685), 2022-10-30
Supplement: s1 [file s1]

**Table S1. Nutrients composition of caviar extracts.**

| <b>Component</b> | <b>70% ethanol extract from caviar</b> | <b>Supercritical CO<sub>2</sub> extract from caviar</b> |
|------------------|----------------------------------------|---------------------------------------------------------|
| Moisture         | 55.96%                                 | 1.14%                                                   |
| Protein          | 23.98%                                 | 68.31%                                                  |
| Lipid            | 10.45%                                 | 9.10%                                                   |
| Ash              | 5.12%                                  | 12.28%                                                  |
| Carbohydrate     | 4.49%                                  | 9.17%                                                   |

**Table S2. Free amino acid contents of enzyme-treated caviar extracts.**

| <b>Free amino acids</b> | <b>Lot1</b> | <b>Lot2</b> | <b>Lot3</b> |
|-------------------------|-------------|-------------|-------------|
| Leu                     | 13.37       | 10.91       | 14.10       |
| Phe                     | 5.39        | 4.35        | 5.72        |
| Tyr                     | 5.93        | 5.32        | 6.05        |
| Ala                     | 4.74        | 4.32        | 4.84        |
| Ile                     | 4.46        | 4.00        | 4.55        |
| Val                     | 3.16        | 2.72        | 0.88        |
| Arg                     | 4.12        | 3.19        | 4.34        |
| Met                     | 3.31        | 2.49        | 3.49        |
| Lys                     | 5.14        | 3.92        | 5.38        |
| Ser                     | 2.75        | 2.60        | 2.77        |
| Thr                     | 2.01        | 1.74        | 2.09        |
| Asn                     | 1.44        | 1.18        | 1.48        |
| Gln                     | 1.93        | 1.57        | 1.99        |
| Glu                     | 2.83        | 2.63        | 2.87        |
| His                     | 1.34        | 1.19        | 1.32        |
| Asp                     | 0.95        | 0.91        | 0.95        |
| Trp                     | 0.60        | 0.53        | 0.62        |
| Gly                     | 0.71        | 0.70        | 0.70        |
| Pro                     | 0.70        | 0.58        | 0.77        |
| Cys                     | 0.05        | 0.07        | 0.06        |

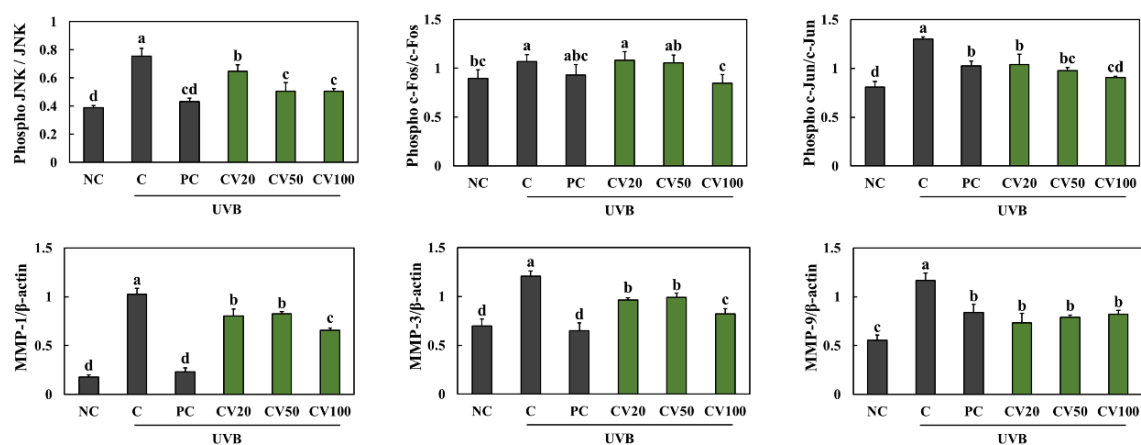

**Figure S1.** Quantification of the western blot bands relative expression in Figure 3A.

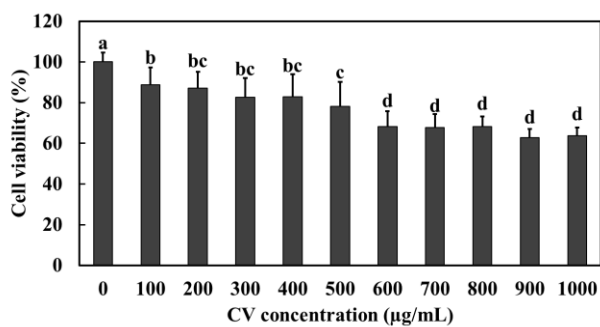

**Figure S2.** Effect of CV treatment in cell viability on HaCaT cells. Values are presented as mean  $\pm$  SD. Different letters (a > b > c > d) indicate a significant difference at  $p < 0.05$  by Duncan's multiple range test.
